# Supplementary material
Source: MDPI journal article supplement (https://www.mdpi.com/2073-4344/12/9/999)
Supplement: s1 [file s1]

## **Supplementary Information**

**Kinetics and mechanisms of Cr(VI) Removal by nZVI:**

**Influencing parameters and modification**

*Submitted to*

*Catalysts*

Yizan Gao, Xiaodan Yang, Xinwei Lu, Minrui Li\*, Lijun Wang, Yuru Wang\*

Department of Environmental Science, School of Geography and Tourism, Shaanxi  
Normal University, Xi'an 710119, China

\* Corresponding author: Tel.: 15891779702 (Y.W.); 029-85310524 (M.L.)

E-mail address: liminrui@snnu.edu.cn (M.L.); wangyuru@snnu.cn (Y.W.)

Summary of contents:

Text S1;

Tables S1–S5;

Figures S1–S5

### Text S1.

1. The reduction rates of nZVI for Cr(VI) reduction were obtained by following formula [1]:

$$\text{Cr removal efficiency (\%)} = \frac{C_0 - C_t}{C_0} \times 100\%$$

$C_0$ : is the initial Cr(VI) concentration in the solution;

$C_t$ : the concentration of Cr(VI) in the solution at min.

2. The kinetic equation for the removal of Cr (VI) by nZVI was as follows:

first-order [2]:  $\ln C = k_1 t + C_0$

second-order [3]:  $1/C = k_2 t + C_1$

pseudo-first-order [4]:  $\ln(q_e - q_t) = k_3 t + C_2$

pseudo-second-order [5]:  $t/q_t = k_4 t + C_3$

$C$ : the concentration of Cr(VI) in the solution at min.

3. The Langmuir and Freundlich isotherm models can be represented as follows:

Langmuir [6]:  $q = kc^{1/n}$

Freundlich [7]:  $q = q_e * bc / (1 + bc)$

$q$ : adsorption capacity at different time ( $\text{mg} \cdot \text{g}^{-1}$ )

4. Intraparticle [8]:  $q_t = k * t^{0.5} + C$

5. Formula for calculating adsorption capacity [9]:  $q = \frac{v(c_0 - c)}{m}$

$q$ : Adsorption capacity at adsorption equilibrium,  $\text{mg/g}$ ;

$V$ : Solution volume, L;

$C_0$ : Initial concentration of solution,  $\text{mg/L}$ ;

$C$ : The concentration of solution at adsorption equilibrium at min,  $\text{mg/L}$ ;

$Q_t$ : adsorption capacity of solution at adsorption equilibrium at min,  $\text{mg/g}$ ;

$Q_e$ : maximum adsorption capacity,  $\text{mg/g}$ .

**Table S1.** The EDS results of pre- and post-reaction of Cr(VI) with nZVI.

|               | Element  | unn. C | norm. C | Atom. C | Error (3 Sigma) |
|---------------|----------|--------|---------|---------|-----------------|
|               |          | [wt.%] | [wt.%]  | [at.%]  | [wt.%]          |
| pre-reaction  | Iron     | 74.01  | 95.16   | 84.92   | 6.03            |
|               | Oxygen   | 3.77   | 4.84    | 15.08   | 2.10            |
|               | Gold     | 0.00   | 0.00    | 0.00    | 0.00            |
|               | Total:   | 77.78  | 100.00  | 100.00  |                 |
| post-reaction | Iron     | 69.72  | 70.93   | 42.04   | 5.67            |
|               | Oxygen   | 27.07  | 27.54   | 56.99   | 10.20           |
|               | Chromium | 1.50   | 1.53    | 0.97    | 0.23            |
|               | Gold     | 0.00   | 0.00    | 0.00    | 0.00            |
|               | Total:   | 98.29  | 100.00  | 100.00  |                 |

**Table S2.** Comparison of  $R^2$  values fitted by various kinetic models at different temperatures.

|      | First order                                     | Second order                               | Pseudo-first order                                         | Pseudo-second order                          |
|------|-------------------------------------------------|--------------------------------------------|------------------------------------------------------------|----------------------------------------------|
| 293K | $\text{Ln}C = 0.031t + 2.93$<br>$R^2 = 0.7075$  | $1/C = 0.0001t + 0.054$<br>$R^2 = 0.6673$  | $\text{Ln}(Q_e - Q_t) = 0.0195t + 2.85$<br>$R^2 = 0.8123$  | $t/Q_t = 0.019t + 0.075$<br>$R^2 = 0.9998$   |
| 303K | $\text{Ln}C = 0.0109t + 2.29$<br>$R^2 = 0.2352$ | $1/C = -0.0002t + 0.053$<br>$R^2 = 0.5492$ | $\text{Ln}(Q_e - Q_t) = 0.0361t + 0.068$<br>$R^2 = 0.6822$ | $t/Q_t = 0.01972t + 0.049$<br>$R^2 = 0.9997$ |
| 313K | $\text{Ln}C = 0.0033t + 2.89$<br>$R^2 = 0.6809$ | $1/C = -9E-0.5t + 0.050$<br>$R^2 = 0.9122$ | $\text{Ln}(Q_e - Q_t) = -0.0407t + 3.63$<br>$R^2 = 0.8307$ | $t/Q_t = 0.019t + 0.097$<br>$R^2 = 0.9983$   |

**Table S3.** Comparison of  $R^2$  values fitted by isothermal adsorption model.

| T (K) | Langmuir     |              |        | Freundlich |       |        |
|-------|--------------|--------------|--------|------------|-------|--------|
|       | $Q_m$ (mg/g) | $K_L$ (L/mg) | $R^2$  | $n/1$      | $K_F$ | $R^2$  |
| 293   | 57.077       | 1.46         | 0.9719 | 0.4329     | 25.11 | 0.9017 |

**Table S4.** Intraparticle diffusion coefficients and intercept values for Cr(VI)

adsorption on nZVI particles at different temperatures.

Step.1

| Temperature (K) | K ( $\text{mg}\cdot\text{g}^{-1}\cdot\text{h}^{0.5}$ ) | Intercept values (C) | R <sup>2</sup> |
|-----------------|--------------------------------------------------------|----------------------|----------------|
| 293 K           | 10.67                                                  | 2.62                 | 0.92           |
| 303 K           | 11.48                                                  | 2.25                 | 0.93           |
| 313 K           | 10.98                                                  | 1.75                 | 0.95           |

Step.2

| Temperature (K) | K ( $\text{mg}\cdot\text{g}^{-1}\cdot\text{h}^{0.5}$ ) | Intercept values (C) | R <sup>2</sup> |
|-----------------|--------------------------------------------------------|----------------------|----------------|
| 293 K           | 37.82                                                  | 1.39                 | 1              |
| 303 K           | 41.49                                                  | 0.98                 | 1              |
| 313 K           | 32.85                                                  | 1.71                 | 1              |

Step.3

| Temperature (K) | K ( $\text{mg}\cdot\text{g}^{-1}\cdot\text{h}^{0.5}$ ) | Intercept values (C) | R <sup>2</sup> |
|-----------------|--------------------------------------------------------|----------------------|----------------|
| 293 K           | 50                                                     | -8.95E-15            | 1              |
| 303 K           | 45.38                                                  | 0.207                | 1              |
| 313 K           | 47.26                                                  | 0.441                | 1              |

**Table S5.** Comparison of the Cr(VI) removal efficiency of nZVI and other related materials

| Sorbent                                                                  | pH  | Adsorption rate<br>(mg/g/h) | Adsorption<br>capacity (mg/g) |
|--------------------------------------------------------------------------|-----|-----------------------------|-------------------------------|
| nano-magnetite[10]                                                       | 6.0 | 3.7                         | 1.5                           |
| Fe <sub>3</sub> O <sub>4</sub> @poly(m-phenylenediamine)<br>particle[11] | 2.0 | 49.2                        | 246.0                         |
| Magnetite[12]                                                            | 2.0 | 7.5                         | 12.5                          |
| liquid nitrogen treated zero-valent iron[13]                             | 6.3 | 0.4                         | 0.4                           |
| graphene oxide hydrogel with shrimp shell<br>magnetic biochar[14]        | 1.0 | 28.6                        | 85.9                          |
| ball milling synthesized FeS <sub>2</sub> @biochar<br>composite[15]      | 3.0 | 57.5                        | 134.0                         |
| nZVI                                                                     | 3.0 | 25.0                        | 50.0                          |
| H <sub>2</sub> A-nZVI                                                    | 3.0 | 66.7                        | 50.0                          |
| Starch-nZVI                                                              | 3.0 | 200.0                       | 50.0                          |
| Fe-Cu                                                                    | 3.0 | 100.0                       | 50.0                          |

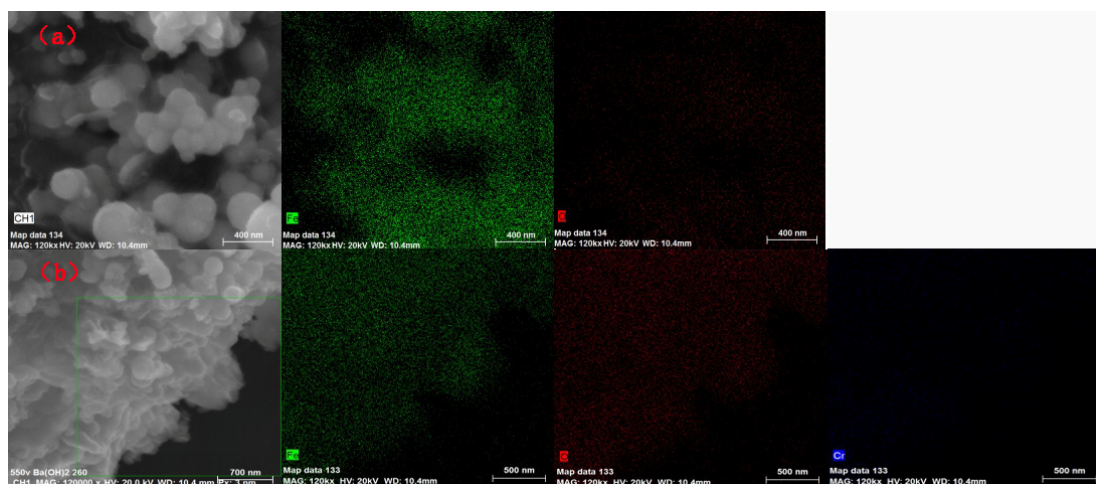

**Figure S1.** The EDS results of pre- (a) and post- (b) reaction of Cr(VI) with nZVI.

$$([\text{Cr(VI)}] = 25 \text{ mg/L}, [\text{nZVI}] = 0.5 \text{ g/L}, \text{pH} = 3, T = 293 \text{ K})$$

It can be seen from the Figure S1 that the content of Fe before the reaction is obviously higher than that after the reaction, while the content of O before the reaction is obviously lower than that after the reaction, which further proves that O participates in the removal of Cr(VI).



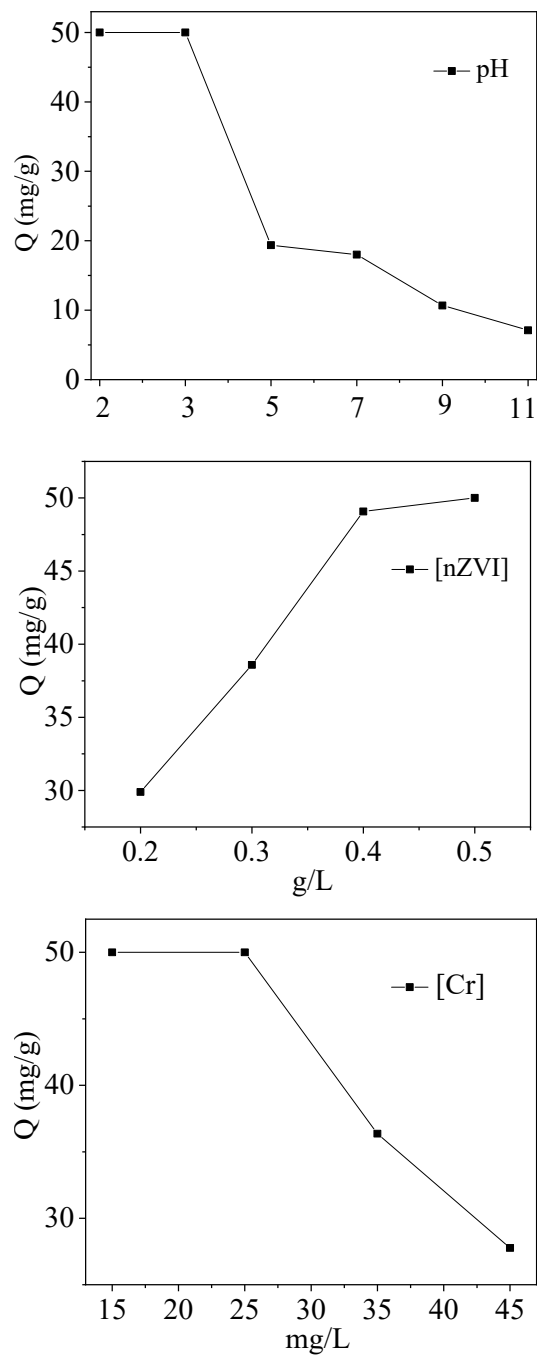

**Figure S2.** Changes of adsorption capacity with pH, initial concentration of Cr(VI) and dosage of nZVI.

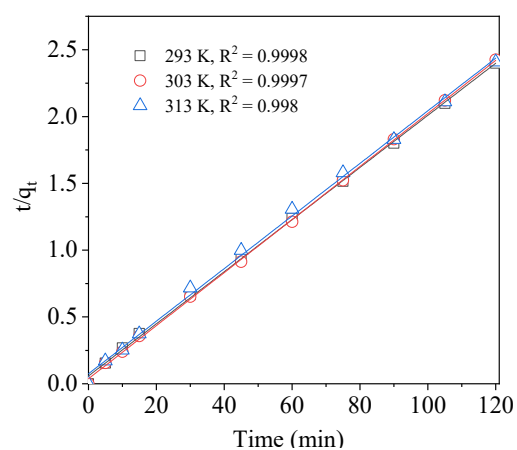

**Figure S3.** Pseudo-second-order kinetic fitting curve of Cr(VI) removal by nZVI.

([Cr(VI)] = 25 mg/L, [nZVI] = 0.5 g/L, pH = 3, T = 120 min)

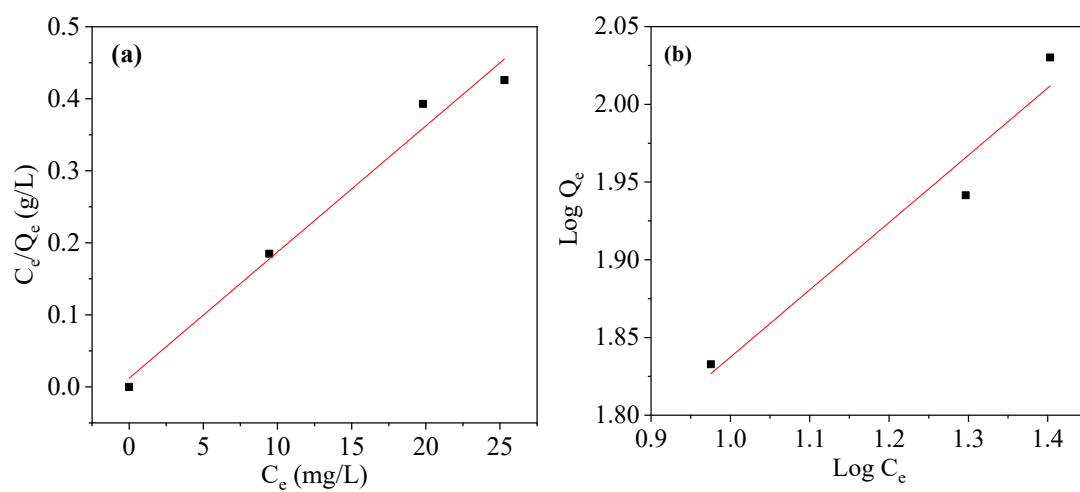

**Figure S4.** Fitting results of isotherm adsorption model (a: Langmuir; b: Freundlich).

([nZVI] = 0.5 g/L, pH = 3, T = 293 K)

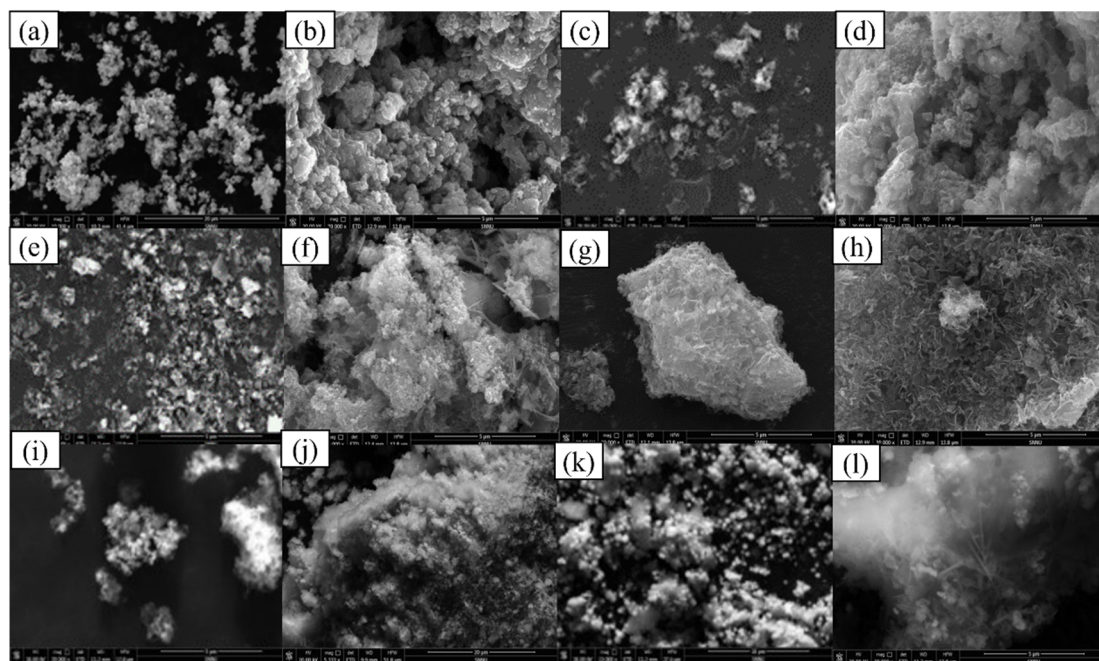

**Figure S5.** The SEM results of pre- and post- reaction of Cr(VI) with supported nZVI [(a,b) H<sub>2</sub>A-nZVI; (c,d) Starch-nZVI; (e,f) Fe-Cu; (g,h) CMC-nZVI; (i,j) Fe-Zn; (k,l) Fe-Mn].

([Cr(VI)] = 25 mg/L, [nZVI] = 0.5 g/L, pH = 3, T = 293 K)

## References

1. Xu, Y.; Chen, J.; Chen, R.; Yu, P.; Guo, S.; Wang, X., Adsorption and reduction of chromium(VI) from aqueous solution using polypyrrole/calcium rectorite composite adsorbent. *Water Research* 2019, 160, 148-157.
2. Sadeh, Y.; Poulsen, T. G.; Bester, K., Modeling organic micro pollutant degradation kinetics during sewage sludge composting. *Waste Management* 2014, 34 (11), 2007-2013.
3. Ho, Y.-S., Review of second-order models for adsorption systems. *Journal of Hazardous Materials* 2006, 136 (3), 681-689.
4. Feng, J.; Su, L.; Ma, Y.; Ren, C.; Guo, Q.; Chen, X., CuFe<sub>2</sub>O<sub>4</sub> magnetic nanoparticles: A simple and efficient catalyst for the reduction of nitrophenol. *Chemical Engineering Journal* 2013, 221, 16-24.
5. Ho, Y. S.; Ng, J. C. Y.; McKay, G., Kinetics of pollutant sorption by biosorbents: Review. *Separation and Purification Methods* 2000, 29 (2), 189-232.
6. Foo, K. Y.; Hameed, B. H., Insights into the modeling of adsorption isotherm systems. *Chemical Engineering Journal* 2010, 156 (1), 2-10.
7. Al-Ghouti, M. A.; Da'ana, D. A., Guidelines for the use and interpretation of adsorption isotherm models: A review. *Journal of Hazardous Materials* 2020, 393.
8. Kegl, T.; Kosak, A.; Lobnik, A.; Novak, Z.; Kralj, A. K.; Ban, I., Adsorption of rare earth metals from wastewater by nanomaterials: A review. *Journal of Hazardous Materials* 2020, 386.
9. Zhao, J.; Boada, R.; Cibin, G.; Palet, C., Enhancement of selective adsorption of Cr species via modification of pine biomass. *Science of the Total Environment* 2021, 756.
10. Komarek, M.; Koretsky, C. M.; Stephen, K. J.; Alessi, D. S.; Chrastry, V., Competitive Adsorption of Cd(II), Cr(VI), and Pb(II) onto Nanomaghemite: A Spectroscopic and Modeling Approach. *Environmental Science & Technology* 2015, 49 (21), 12851-12859.
11. Wang, T.; Zhang, L.; Li, C.; Yang, W.; Song, T.; Tang, C.; Meng, Y.; Dai, S.; Wang, H.; Chai, L.; Luo, J., Synthesis of Core-Shell Magnetic Fe<sub>3</sub>O<sub>4</sub>@poly(m-Phenylenediamine) Particles for Chromium Reduction and Adsorption. *Environmental Science & Technology* 2015, 49 (9), 5654-5662.

12. Ben Tahar, L.; Oueslati, M. H.; Abualreish, M. J. A., Synthesis of magnetite derivatives nanoparticles and their application for the removal of chromium (VI) from aqueous solutions. *Journal of Colloid and Interface Science* 2018, 512, 115-126.
13. Hu, Y.; Peng, X.; Ai, Z.; Jia, F.; Zhang, L., Liquid Nitrogen Activation of Zero-Valent Iron and Its Enhanced Cr(VI) Removal Performance. *Environmental Science & Technology* 2019, 53 (14), 8333-8341.
14. Mahmoud, M. E.; Mohamed, A. K.; Salam, M. A., Self-decoration of N-doped graphene oxide 3-D hydrogel onto magnetic shrimp shell biochar for enhanced removal of hexavalent chromium. *Journal of Hazardous Materials* 2021, 408.
15. Tang, J.; Zhao, B.; Lyu, H.; Li, D., Development of a novel pyrite/biochar composite (BM-FeS<sub>2</sub>@BC) by ball milling for aqueous Cr(VI) removal and its mechanisms. *Journal of Hazardous Materials* 2021, 413.
